# Supplementary material for: Eine Frage der Wertschätzung, Passung und Normen
Source: Atypon-hosted journal article supplement (doi:10.1026/0932-4089/a000412), 2023-05-08
Supplement: 0932-4089_a000412_esm1.pdf [file 0932-4089_a000412_esm1.pdf]

## ESM 1

### **Maßnahmen zur Stichprobenrekrutierung**

Zwischen August 2019 und Januar 2020 erhielten erstens 1911 Selbsthilfegruppen, 297 Selbsthilfekontaktstellen, 526 Rehakliniken, 88 Selbsthilfeorganisationen (auf Landes- und Bundesebene) und 25 Arbeitsgemeinschaften von Schwerbehindertenvertretungen personalisierte Einladungsschreiben für die Verbreitung des Fragebogens innerhalb ihres Wirkungskreises. Zweitens wurde die Einladung in 37 Facebookgruppen zu verschiedenen Erkrankungen und Behinderungen gepostet. Drittens erschienen in 14 Online-Newsbereichen von Akteuren im Bereich Arbeit und Rehabilitation sowie in zwei Blogbeiträgen Teilnahmeaufrufe.

Die Rekrutierung diente der Suche nach Teilnehmenden für zwei unabhängige Querschnittstudien, wobei hier nur über die zweite berichtet wird.

**Tabelle E1***Demografische Angaben*

|                                                         | <b>Prozent</b>  |     |          |           |
|---------------------------------------------------------|-----------------|-----|----------|-----------|
| Geschlecht (w, m, d)                                    | 68.3, 31.2, 0.5 |     |          |           |
| Höchster beruflicher Abschluss ( $\geq$ Bachelor-Level) | 55.9            |     |          |           |
| Befristung (ja)                                         | 10.7            |     |          |           |
| Beschäftigungsdauer ( $\geq$ 3 Jahre)                   | 81.0            |     |          |           |
| Anerkannte Schwerbehinderung (ja oder Gleichstellung)   | 80.9            |     |          |           |
|                                                         | Min             | Max | <i>M</i> | <i>SD</i> |
| Alter                                                   | 19              | 66  | 47.30    | 10.51     |
| Dauer der dgB (Jahre)                                   | 0               | 63  | 20.91    | 15.69     |
| Erkennbarkeit der dgB <sup>1</sup>                      | 1               | 7   | 3.37     | 2.21      |
| Stärke der Beeinträchtigungen im Alltag <sup>2</sup>    | 3               | 7   | 4.26     | 1.12      |

*Anmerkungen.*  $N = 801$ . Min = Minimum, Max = Maximum,  $M$  = Mittelwert,  $SD$  = Standardabweichung.

Im Vergleich zur Repräsentativbefragung von Menschen mit Behinderungen (Harand, Steinwede, Schröder & Thiele, 2021) ist unsere Stichprobe deutlich weiblicher und umfasst mehr Menschen mit Schwerbehindertenstatus. In der Repräsentativbefragung gaben 51 % der Menschen mit selbsteingeschätzter Behinderung ein weibliches Geschlecht und 32 % einen Schwerbehindertenstatus an (Bundesministerium für Arbeit und Soziales, 2021, S. 57 und 54). Für den Vergleich muss beachtet werden, dass sich die den beiden Studien zugrundeliegenden Grundgesamtheiten unterscheiden. Wir beziehen uns auf Arbeitnehmende mit dgB über 18 Jahre am ersten Arbeitsmarkt mit einer Arbeitszeit von mehr als 18 Wochenstunden. Die Repräsentativbefragung bezieht sich auf alle Menschen mit selbsteingeschätzter Behinderung zwischen 16 und 79 Jahren. Der Unterschied in der Geschlechterverteilung lässt sich jedoch trotz der unterschiedlichen zugrundeliegenden Grundgesamtheiten voraussichtlich eher darauf zurückführen, dass Frauen häufiger bereit sind, an Online-Befragungen teilzunehmen als Männer (Smith, 2008). Der höhere Anteil schwerbehinderter Menschen könnte unter anderem darauf zurückzuführen sein, dass die Einladung zur Befragung auch von Schwerbehindertenvertretungen weitergeleitet wurde.

Der dritte Teilhabebereich (Bundesministerium für Arbeit und Soziales, 2021, S. 172; Daten aus dem Mikrozensus 2017) gibt für Menschen mit langfristigen gesundheitlichen Beeinträchtigungen (amtlich festgestellter Grad der Behinderung oder eine Krankheit/Unfallverletzung, die länger als sechs Wochen andauert) im Alter zwischen 30 und 64 Jahren ein deutlich niedrigeres Bildungslevel als in unserer Studie an, nämlich 29.5 % mit einem Abschluss auf Bachelorlevel oder höher. Für den Vergleich wäre jedoch neben der unterschiedlichen Altersstruktur zu beachten, dass sich dieser Wert aus dem Mikrozensus auf alle Menschen mit Beeinträchtigung bezieht, also auch auf nicht Erwerbstätige. Für das Durchschnittsalter, die Befristung des Arbeitsvertrages und die Beschäftigungsdauer finden sich weder in der Repräsentativbefragung noch im dritten Teilhabebereich Daten, die sich für einen Vergleich mit unserer Stichprobe eignen.

<sup>1</sup> Skala von 1 (gar nicht erkennbar) bis 7 (sofort erkennbar).

<sup>2</sup> Skala von 1 (gar nicht) bis 7 (sehr stark). Ein Wert von mindestens 3 war Voraussetzung für die Studienteilnahme.

**Tabelle E2***Eingeschränkte Funktionsbereiche*

|                                              | Prozent |
|----------------------------------------------|---------|
| Bewegung, Muskeln, Knochen, Gelenke          | 61.9    |
| Schmerzen                                    | 51.2    |
| Gefühle, Psyche, Aufbau sozialer Beziehungen | 47.2    |
| Denken, Lernen, Erinnern oder Konzentrieren  | 44.9    |
| Stoffwechsel, Gewicht                        | 28.6    |
| Immunsystem                                  | 28.1    |
| Hören, Gleichgewicht                         | 24.5    |
| Verdauungssystem                             | 23.9    |
| Herz-Kreislauf-System, Blut                  | 19.0    |
| Haut                                         | 14.5    |
| Sehen                                        | 13.7    |
| Atmen                                        | 12.7    |
| Niere, Blase, Urogenitaltrakt, Unterleib     | 12.6    |
| Sprechen, Stimme, Sprache                    | 8.3     |

*Anmerkungen.*  $N = 801$ . Mehrfachnennungen möglich. Anzahl eingeschränkter Funktionsbereiche  $M = 3.93$ ,  $SD = 2.27$ .

Im Vergleich zur Repräsentativbefragung zur Teilhabe von Menschen mit Behinderungen (Harand et al., 2021) ergibt sich eine relativ ähnliche Gewichtung der eingeschränkten Funktionsbereiche. Dort gaben Menschen mit selbsteingeschätzter Behinderung folgende Einschränkungsbereiche an (im Durchschnitt drei Bereiche pro Person): Bewegen 64 %, Schmerzen 58 %, schwere seelische oder psychische Probleme und Suchterkrankung gemeinsam 35 %, Sehen 24 %, Lernen, Denken, Erinnern oder Orientieren 20 %, Hören 18 %, Sprechen 8 % (Daten aus dem dritten Teilhabebericht, Bundesministerium für Arbeit und Soziales, 2021, S. 56). Für den Vergleich muss beachtet werden, dass sich die den beiden Studien zugrundeliegenden Grundgesamtheiten unterscheiden. Wir beziehen uns auf Arbeitnehmende mit dgB über 18 Jahre am ersten Arbeitsmarkt mit einer Arbeitszeit von mehr als 18 Wochenstunden. Die Repräsentativbefragung bezieht sich auf alle Menschen mit selbsteingeschätzter Behinderung zwischen 16 und 79 Jahren.

**Literaturverzeichnis**

Bundesministerium für Arbeit und Soziales (Hrsg.). (2021). *Dritter Teilhabebericht der Bundesregierung über die Lebenslagen von Menschen mit Beeinträchtigungen.*

*Teilhabe – Beeinträchtigung – Behinderung.* Bonn, Germany.

Harand, J., Steinwede, J., Schröder, H. & Thiele, N. (2021). *Repräsentativbefragung zur Teilhabe von Menschen mit Behinderungen. 4. Zwischenbericht* (Forschungsbericht 571). Bonn, Germany: Bundesministerium für Arbeit und Soziales.

Smith, W. G. (2008). *Does gender influence online survey participation? A record-linkage analysis of university faculty online survey response behavior* (ERIC Document Reproduction Service ED 501717). San José State University.
