# Supplementary material for: Eine Frage der Wertschätzung, Passung und Normen
Source: Atypon-hosted journal article supplement (doi:10.1026/0932-4089/a000412), 2023-05-08
Supplement: 0932-4089_a000412_esm2.pdf [file 0932-4089_a000412_esm2.pdf]

**ESM 2****Skala zu eingeschränkten Funktionsbereiche**

Der folgende Abschnitt betrifft Probleme oder Schwierigkeiten, die aufgrund gesundheitlicher Beeinträchtigungen entstehen können. Häufig betreffen die Probleme oder Schwierigkeiten verschiedene Bereiche von Körper und Psyche.

*Bitte wählen Sie alles aus, was auf Sie persönlich zutrifft. Sie können bei dieser Frage mehrere Antwortkreuze machen. Hinweis: In den Klammern werden nur Beispiele genannt.*

Meine gesundheitlichen Beeinträchtigungen verursachen bei mir Probleme oder Schwierigkeiten...

- ...beim Bewegen, in den Gelenken, Muskeln oder Knochen  
(zum Beispiel durch Wirbelsäulenerkrankungen, Arthrose, Rheuma, eine Querschnittlähmung, Parkinson, MS, etc.)
- ...beim Denken, Lernen, Erinnern oder Konzentrieren  
(zum Beispiel durch ADHS, Migräne, Depressionen, eine Lernbehinderung, Legasthenie / Dyskalkulie, MS, ein Schädel-Hirn-Trauma, einen Tumor, etc.)
- ...mit den Gefühlen, der Psyche oder dem Aufbau sozialer Beziehungen  
(zum Beispiel durch Ängste, Depressionen, Schlafstörungen, Essstörung, Sucht, Autismus, etc.)
- ...beim Sehen  
(zum Beispiel durch Erblindung, Makula-Degeneration, Katarakt, Glaukom,

Retinitis Pigmentosa, etc. / Wichtig: nur solche, die durch eine Brille oder Kontaktlinsen nicht ausgeglichen werden können)

- ...beim Hören oder mit dem Gleichgewicht  
(zum Beispiel durch Schwerhörigkeit, chronischen Tinnitus, Morbus Menière, etc.)
- ...beim Sprechen, mit der Stimme oder mit der Sprache  
(zum Beispiel durch Stimmstörungen, Parkinson, einen Schlaganfall, Stottern und andere Sprechstörungen, etc. / Wichtig: nicht Fremdsprachigkeit)
- ...durch Schmerzen  
(zum Beispiel durch eine Migräne, Osteoporose, Rheuma, Fibromyalgie, eine Krebserkrankung, etc.)
- ...mit dem Herz-Kreislauf-System oder dem Blut  
(zum Beispiel durch Bluthochdruck, eine koronare Herzerkrankung, Herzschwäche, Herzrhythmusstörungen, Blutarmut, etc.)
- ...mit dem Atmen  
(zum Beispiel durch Asthma, COPD, Lungenkrebs, etc.)
- ...mit dem Immunsystem  
(zum Beispiel durch Rheuma, MS, Allergien, HIV, etc.)
- ...mit der Haut  
(zum Beispiel durch Neurodermitis, Schuppenflechte, krankhaften Haarausfall, etc.)
- ...mit dem Verdauungssystem  
(zum Beispiel durch eine Magen-, Leber- oder Gallenstörung, Morbus Crohn, Colitis ulcerosa, etc.)

- ...mit dem Stoffwechsel oder dem Gewicht  
(zum Beispiel durch Diabetes mellitus, Gicht, eine Hormonstörung, eine Schilddrüsendysfunktion, eine Essstörung, etc.)
- ...mit den Nieren, der Blase oder dem Urogenitaltrakt / Unterleib  
(zum Beispiel durch eine chronische Niereninsuffizienz, eine Blasenstörung, etc.)
- Andere gesundheitliche Probleme oder Schwierigkeiten, und zwar: (Nennung nur falls gewünscht. Bitte beachten Sie, dass Sie zur Wahrung Ihrer Anonymität keine genaue Diagnose nennen.) \_\_\_\_\_

### **Informationen zur Skala**

Die Skala erfasst, ebenso wie in der Repräsentativbefragung zur Teilhabe von Menschen mit Behinderungen (Harand, Steinwede, Schröder & Thiele, 2021), Bereiche eingeschränkter Körperfunktionen im Sinne der International Classification of Functioning, Disability and Health (ICF; World Health Organization, 2005) mit einem Multiple-Choice-Item.

Manche Bereiche werden für eine genauere Differenzierung mit mehreren Antwortoptionen dargestellt. Für jede Antwortoption werden Beispiele von Erkrankungen genannt, um die Verständlichkeit der Bereichsbezeichnungen beim Ausfüllen zu erhöhen. Einziger nicht in den Antwortoptionen repräsentierter Bereich des ICF ist der des *reproduktiven Systems*. Grund dafür ist, dass uns Angaben zu einem potenziell schamhafteten Bereich in einer Befragung zum Thema Arbeit nicht sinnvoll erschien. Falls

Betroffene solche Einschränkungen dennoch ansprechen möchten, kann dafür die Antwortoption *Andere gesundheitliche Probleme oder Schwierigkeiten, und zwar genutzt* werden. Die folgende Tabelle stellt dar, wie die einzelnen Körperfunktionsbereiche der ICF in der Skala erfasst werden. Eine zusätzliche Tabellenspalte zeigt die Erfassung von Beeinträchtigung in der Repräsentativbefragung zur Teilhabe von Menschen mit Behinderungen (Harand et al., 2021).

| Körperfunktionsbereich<br>in der ICF                                           | Antwortoptionen in der Skala                                                                                                                                                  | Antwortoptionen in der Repräsentativbefragung                                                                                                                                                      |
|--------------------------------------------------------------------------------|-------------------------------------------------------------------------------------------------------------------------------------------------------------------------------|----------------------------------------------------------------------------------------------------------------------------------------------------------------------------------------------------|
| B1 Mentale Funktionen                                                          | <ul style="list-style-type: none"> <li>• beim Denken, Lernen, Erinnern, Konzentrieren</li> <li>• mit den Gefühlen, der Psyche oder dem Aufbau sozialer Beziehungen</li> </ul> | <ul style="list-style-type: none"> <li>• beim Lernen, Denken, Erinnern, Orientieren im Alltag</li> <li>• durch seelische oder psychische Probleme</li> <li>• durch eine Suchterkrankung</li> </ul> |
| B2 Sinnesfunktionen und Schmerz                                                | <ul style="list-style-type: none"> <li>• beim Sehen</li> <li>• beim Hören oder mit dem Gleichgewicht</li> <li>• durch Schmerzen</li> </ul>                                    | <ul style="list-style-type: none"> <li>• beim Sehen</li> <li>• beim Hören</li> <li>• durch Schmerzen</li> </ul>                                                                                    |
| B3 Stimm- und Sprechfunktionen                                                 | <ul style="list-style-type: none"> <li>• beim Sprechen, mit der Stimme oder mit der Sprache</li> </ul>                                                                        | <ul style="list-style-type: none"> <li>• beim Sprechen</li> </ul>                                                                                                                                  |
| B4 Funktionen des kardiovaskulären, hämatologischen, Immun- und Atmungssystems | <ul style="list-style-type: none"> <li>• mit dem Herz-Kreislauf-System oder dem Blut</li> <li>• mit dem Atmen</li> <li>• mit dem Immunsystem</li> </ul>                       | -                                                                                                                                                                                                  |
| B5 Funktionen des Verdauungs-, des Stoffwechsels- und des endokrinen Systems)  | <ul style="list-style-type: none"> <li>• mit dem Verdauungssystem</li> <li>• mit dem Stoffwechsel oder dem Gewicht</li> </ul>                                                 | -                                                                                                                                                                                                  |
| B6 Funktionen des Urogenital- und reproduktiven Systems                        | <ul style="list-style-type: none"> <li>• mit den Nieren, der Blase, dem Urogenitaltrakt / Unterleib</li> </ul>                                                                | -                                                                                                                                                                                                  |

---

|    |                                                              |                                                                      |                                      |
|----|--------------------------------------------------------------|----------------------------------------------------------------------|--------------------------------------|
| B7 | Neuromuskuloskeletale<br>und bewegungsbezogene<br>Funktionen | • beim Bewegen, mit den Gelen-<br>ken, Muskeln oder den Kno-<br>chen | • beim Bewegen                       |
| B8 | Funktionen der Haut und<br>der Hautanhangsgebilde            | • mit der Haut                                                       | -                                    |
| -  | -                                                            | -                                                                    | • durch chronische Erkrankun-<br>gen |

---

### Literaturverzeichnis

Harand, J., Steinwede, J., Schröder, H. & Thiele, N. (2021). *Repräsentativbefragung zur Teilhabe von Menschen mit Behinderungen. 4. Zwischenbericht* (Forschungsbericht 571). Bonn, Germany: Bundesministerium für Arbeit und Soziales.

World Health Organization. (2005). *ICF. Internationale Klassifikation der Funktionsfähigkeit, Behinderung und Gesundheit* (Deutsches Institut für Medizinische Dokumentation und Information & WHO-Kooperationszentrum für das System internationaler Klassifikationen, Hrsg.). Genf, Switzerland.
