# Supplementary material for: Eine Frage der Wertschätzung, Passung und Normen
Source: Atypon-hosted journal article supplement (doi:10.1026/0932-4089/a000412), 2023-05-08
Supplement: 0932-4089_a000412_esm3.pdf [file 0932-4089_a000412_esm3.pdf]

**ESM 3**

**Skalen**

| Konstrukt                                                                         | Skala                                                                                                                                                 | Anmerkungen                                                                                                                                                                                                                                                                                                                                                         | Beispielitems / Iteminhalt                                                                                                                                                                                        |
|-----------------------------------------------------------------------------------|-------------------------------------------------------------------------------------------------------------------------------------------------------|---------------------------------------------------------------------------------------------------------------------------------------------------------------------------------------------------------------------------------------------------------------------------------------------------------------------------------------------------------------------|-------------------------------------------------------------------------------------------------------------------------------------------------------------------------------------------------------------------|
| <b>Inklusionserleben</b>                                                          | Perceived Group Inclusion Scale (Jansen, Otten, van der Zee & Jans, 2014)                                                                             | Übersetzung Chakraverty, Zimmer und Niehaus (2023). Die Kürzung von 16 auf 8 Items erfolgte in Absprache mit den Autor:innen der Skala; siehe auch Jansen, Otten und van der Zee (2016). Die Skala kann, obwohl hierarchisch-zweidimensional konzipiert, auch über den Gesamtwert der Skala erfasst werden (Jansen, Vos, Otten, Podsiadlowski & van der Zee, 2016). | <i>Zugehörigkeit:</i> „Diese Gruppe gibt mir das Gefühl, in die Gruppe zu passen.“<br><i>Authentizität:</i> „Diese Gruppe ermutigt mich, mich zu zeigen, wie ich bin.“                                            |
| <i>Positive Organisationskultur im Umgang mit dgB</i>                             |                                                                                                                                                       |                                                                                                                                                                                                                                                                                                                                                                     |                                                                                                                                                                                                                   |
| <b>Positive Sicht des Arbeitgebers auf die Beschäftigung von Menschen mit dgB</b> | Subskala Integration and Learning Perspective des Diversity Perspective Questionnaire (Podsiadlowski, Gröschke, Kogler, Springer & van der Zee, 2013) | Auf Deutsch von den Autor:innen erhalten. Leichte Anpassungen.                                                                                                                                                                                                                                                                                                      | „Mein Arbeitgeber vermittelt glaubhaft, dass er findet: Die Beschäftigung gesundheitlich beeinträchtigter ArbeitnehmerInnen bringt neue Ideen und unterschiedliches Wissen für verschiedene Arbeitsbereiche ein.“ |

*Fortsetzung nächste Seite*

| Konstrukt                                                           | Skala                                                                                                                                                                                                                                                                                                                                                                                                                                                                                                                                                                                                                                                                                                                                                                                                                                                                                                                                                                                                                                                                                                 | Anmerkungen        | Beispielitems / Iteminhalt                                                                                     |
|---------------------------------------------------------------------|-------------------------------------------------------------------------------------------------------------------------------------------------------------------------------------------------------------------------------------------------------------------------------------------------------------------------------------------------------------------------------------------------------------------------------------------------------------------------------------------------------------------------------------------------------------------------------------------------------------------------------------------------------------------------------------------------------------------------------------------------------------------------------------------------------------------------------------------------------------------------------------------------------------------------------------------------------------------------------------------------------------------------------------------------------------------------------------------------------|--------------------|----------------------------------------------------------------------------------------------------------------|
| <i>Positive Organisationskultur im Umgang mit dgB (Fortsetzung)</i> |                                                                                                                                                                                                                                                                                                                                                                                                                                                                                                                                                                                                                                                                                                                                                                                                                                                                                                                                                                                                                                                                                                       |                    |                                                                                                                |
| <b>Unterstützende Arbeitsbedingungen für Menschen mit dgB</b>       | Eigene Entwicklung der Forschungsgruppe am Lehrstuhl basierend auf den Ergebnissen der Befragung <i>Emerging Employment Issues for People with Disabilities</i> von Schrader, Malzer, Erickson und Bruyere (2011; siehe auch Schrader, Malzer und Bruyère; 2014). Verwendet wurden die Ergebnisse zu inklusionsförderlichen organisationsbezogenen Faktoren, die zu einer Offenlegung von gesundheitlichen Beeinträchtigungen ermutigen. Die vier Items der Skala lauten: „Mein Arbeitgeber... 1) „gibt sich Mühe, Arbeitsplätze generell so zu gestalten, dass sie für MitarbeiterInnen mit gesundheitlichen Beeinträchtigungen geeignet sind.“, 2) „zeigt sich offen für die Bedürfnisse von MitarbeiterInnen mit gesundheitlichen Beeinträchtigungen.“, 3) „ist glaubwürdig daran interessiert, MitarbeiterInnen mit gesundheitlichen Beeinträchtigungen einzustellen.“ und 4) „bietet gute Rahmenbedingungen für MitarbeiterInnen mit gesundheitlichen Beeinträchtigungen.“. Die Antworten erfolgten über eine 5-stufige Skala von 1 (Trifft überhaupt nicht zu) bis 5 (Trifft voll und ganz zu). |                    |                                                                                                                |
| <i>Ermöglichung von Mitgestaltung und Entwicklung</i>               |                                                                                                                                                                                                                                                                                                                                                                                                                                                                                                                                                                                                                                                                                                                                                                                                                                                                                                                                                                                                                                                                                                       |                    |                                                                                                                |
| <b>Faire Praktiken zur Potentialentfaltung</b>                      | Subskala Fairness des Inclusiveness Inventory (Hedman, 2016)                                                                                                                                                                                                                                                                                                                                                                                                                                                                                                                                                                                                                                                                                                                                                                                                                                                                                                                                                                                                                                          | Eigene Übersetzung | „Ich glaube, dass ich die gleichen Chancen und Möglichkeiten habe wie jede/r andere MitarbeiterIn auch.“       |
| <b>Beteiligung bei Entscheidungen zur eigenen Arbeitstätigkeit</b>  | Subskala Influence in Decision Making der Inclusion-Exclusion Scale (Mor-Barak & Cherin, 1998),                                                                                                                                                                                                                                                                                                                                                                                                                                                                                                                                                                                                                                                                                                                                                                                                                                                                                                                                                                                                       | Eigene Übersetzung | „Ich kann Entscheidungen über Arbeitsaufgaben beeinflussen.“                                                   |
| <i>Passende Arbeitsplätze</i>                                       |                                                                                                                                                                                                                                                                                                                                                                                                                                                                                                                                                                                                                                                                                                                                                                                                                                                                                                                                                                                                                                                                                                       |                    |                                                                                                                |
| <b>Passung zwischen Fähigkeiten und Arbeitsanforderungen</b>        | Subskala Demands-Abilities Fit der Subjective Fit Perceptions Scale (Cable & DeRue, 2002)                                                                                                                                                                                                                                                                                                                                                                                                                                                                                                                                                                                                                                                                                                                                                                                                                                                                                                                                                                                                             | Eigene Übersetzung | „Die Übereinstimmung zwischen den Anforderungen meines Jobs und meinen persönlichen Fähigkeiten ist sehr gut.“ |

*Fortsetzung nächste Seite*

| Konstrukt                                                                              | Skala                                                                                                                                                                                                                                                                                                                                                                                                                                                                                                                                                                                                                                                                                                                                                                                                                                                                                                                                                                                                                                                                                                                                                                                                                                                                                                                                                                                                          | Übersetzung                              | Beispielitems / Iteminhalt                                                                                                    |
|----------------------------------------------------------------------------------------|----------------------------------------------------------------------------------------------------------------------------------------------------------------------------------------------------------------------------------------------------------------------------------------------------------------------------------------------------------------------------------------------------------------------------------------------------------------------------------------------------------------------------------------------------------------------------------------------------------------------------------------------------------------------------------------------------------------------------------------------------------------------------------------------------------------------------------------------------------------------------------------------------------------------------------------------------------------------------------------------------------------------------------------------------------------------------------------------------------------------------------------------------------------------------------------------------------------------------------------------------------------------------------------------------------------------------------------------------------------------------------------------------------------|------------------------------------------|-------------------------------------------------------------------------------------------------------------------------------|
| <i>Passende Arbeitsplätze (Fortsetzung)</i>                                            |                                                                                                                                                                                                                                                                                                                                                                                                                                                                                                                                                                                                                                                                                                                                                                                                                                                                                                                                                                                                                                                                                                                                                                                                                                                                                                                                                                                                                |                                          |                                                                                                                               |
| <b>Adäquatheit von Arbeitsplatzanpassungen</b>                                         | Eigene Entwicklung. Die Erfassung der Variable erfolgt in zwei Schritten. 1) Ermittlung der individuellen Bedürfnisse („Was brauchen Sie, um gut arbeiten zu können?“). Präsentiert werden 24 Antwortmöglichkeiten zur Mehrfachauswahl. Die Antwortmöglichkeiten basieren auf Forschungsarbeiten von ver.di – Vereinte Dienstleistungsgewerkschaft (2014), Anand und Sevak (2017), Konrad, Moore, Ng, Doherty und Breward (2013), Wang, Patten, Currie, Sareen und Schmitz (2011), Sundar (2017), Gignac, Cao und McAlpine (2015), Conyers und Boomer (2005), Padkapayeva et al. (2017) und Prince (2017). Beispiele sind: „zeitliche Flexibilität (z. B. angepasste Pausenregelung, flexible Arbeitszeiten, flexibler Arbeitsablauf“, „technische Hilfsmittel oder eine spezielle Ausstattung / Anpassung des Arbeitsplatzes (z. B. unterfahrbare Tische, Screen Reader, FM-Anlage)“, „eine angepasste Art der Kommunikation durch das Arbeitsumfeld (z. B. Blickkontakt, deutliche Aussprache, keine Verwendung von Ironie)“. Ziel war die Bewusstmachung der eigenen Bedarfe. 2) Erfassung des Vorhandenseins der benötigten Anpassungen mit einem 7-stufigen Item von 1 (Trifft gar nicht zu) bis 7 (Trifft voll und ganz zu): „An meinem Arbeitsplatz finde ich die Bedingungen, Gegebenheiten und Hilfen vor, auf die ich angewiesen bin.“. Für alle Analysen verwendeten wir das Item aus Schritt zwei. |                                          |                                                                                                                               |
| <i>Wertschätzendes und sicheres Teamklima</i>                                          |                                                                                                                                                                                                                                                                                                                                                                                                                                                                                                                                                                                                                                                                                                                                                                                                                                                                                                                                                                                                                                                                                                                                                                                                                                                                                                                                                                                                                |                                          |                                                                                                                               |
| <b>Wertschätzender Umgang des/der Vorgesetzten mit Herausforderungen durch die dgB</b> | Subskalen Supervisor Emotional Support und Appraisal Support der Support for Workers with Disability-Skala (Lysaght, Fabrigar, Larmour-Trode, Stewart & Friesen, 2012)                                                                                                                                                                                                                                                                                                                                                                                                                                                                                                                                                                                                                                                                                                                                                                                                                                                                                                                                                                                                                                                                                                                                                                                                                                         | Eigene Übersetzung. Leichte Anpassungen. | „Mein Vorgesetzter / Meine Vorgesetzte zeigt sich aufrichtig und ehrlich besorgt, wenn es mir gesundheitlich nicht gut geht.“ |

*Fortsetzung nächste Seite*

| Konstrukt                                                                          | Skala                                                                                                                            | Anmerkungen                                             | Beispielitems / Iteminhalt                                                                                                                                                                                                   |
|------------------------------------------------------------------------------------|----------------------------------------------------------------------------------------------------------------------------------|---------------------------------------------------------|------------------------------------------------------------------------------------------------------------------------------------------------------------------------------------------------------------------------------|
| <i>Wertschätzendes und sicheres Teamklima (Fortsetzung)</i>                        |                                                                                                                                  |                                                         |                                                                                                                                                                                                                              |
| <b>Wertschätzender Umgang von Kolleg:innen mit Herausforderungen durch die dgB</b> | Subskalen Co-worker Emotional Support und Appraisal Support der Support for Workers with Disability-Skala (Lysaght et al., 2012) | Eigene Übersetzung. Leichte Anpassungen.                | „Meine KollegInnen springen für mich ein und bieten mir Entlastung an, wenn ich dies benötige.“                                                                                                                              |
| <b>Sicherheit im Team</b>                                                          | Team Psychological Safety (Edmondson, 1999)                                                                                      | Übersetzung Baer und Frese (2003). Leichte Anpassungen. | „Als Mitglied dieses Teams kann man Probleme und heikle Themen ansprechen.“                                                                                                                                                  |
| <b>Angriffe und Diffamierungen</b>                                                 | Subskala Verbal Harrasment des Generalized Workplace Harassment Questionnaire (Rospenda & Richman, 2004)                         | Eigene Übersetzung.                                     | „Wie oft waren Sie in den letzten 12 Monaten an Ihrem Arbeitsplatz in einer Situation, in der jemand aus Ihrem Arbeitsumfeld sich Ihnen gegenüber negativ über Ihre Intelligenz, Kompetenz oder Produktivität geäußert hat?“ |
| <i>Zufriedenstellende Bezahlung</i>                                                |                                                                                                                                  |                                                         |                                                                                                                                                                                                                              |
| <b>Zufriedenheit mit der Bezahlung</b>                                             | Subskala Bezahlung des Kurzfragebogens zur Erfassung Allgemeiner und Facettenspezifischer Arbeitszufriedenheit (Haarhaus, 2016)  |                                                         | „Meine Bezahlung ist fair.“                                                                                                                                                                                                  |

| Konstrukt                                                                                             | Skala                                                                                                                                                                                                                                                                                                                                                                                                                                                                                                                                                                                                                                                                                                                                                                                                                                                                                                                                                                                                      | Anmerkungen | Beispielitems / Iteminhalt |
|-------------------------------------------------------------------------------------------------------|------------------------------------------------------------------------------------------------------------------------------------------------------------------------------------------------------------------------------------------------------------------------------------------------------------------------------------------------------------------------------------------------------------------------------------------------------------------------------------------------------------------------------------------------------------------------------------------------------------------------------------------------------------------------------------------------------------------------------------------------------------------------------------------------------------------------------------------------------------------------------------------------------------------------------------------------------------------------------------------------------------|-------------|----------------------------|
| <i>Vorhandensein positiver Rollenmodelle</i>                                                          |                                                                                                                                                                                                                                                                                                                                                                                                                                                                                                                                                                                                                                                                                                                                                                                                                                                                                                                                                                                                            |             |                            |
| <b>Kenntnis von Kolleg:innen oder Vorgesetzten mit dgB, deren offener Umgang mit der dgB ermutigt</b> | Eigene Entwicklung. Die Erfassung der Variable erfolgte in zwei Schritten. In Schritt eins wurde mit einem Item die Kenntnis anderer Mitarbeiter:innen erfragt, die offen mit ihrer gesundheitlichen Beeinträchtigung umgehen: „Kennen Sie andere MitarbeiterInnen bei Ihrem Arbeitgeber, die offen mit ihren gesundheitlichen Beeinträchtigungen umgehen?“. Es konnte mit „ja“ oder „nein“ geantwortet werden. Im zweiten Schritt wurde, falls das erste Item bejaht wurde, erfragt, ob es unter diesen Personen mindestens ein mutmachendes Beispiel für den eigenen Umgang gibt: „Gibt es unter diesen Personen mindestens ein Beispiel, das Ihnen Mut macht für den eigenen Umgang mit Ihren gesundheitlichen Beeinträchtigungen?“. Es konnte mit „(eher) ja“ oder „(eher) nein“ geantwortet werden. Für die Analyse berechneten wir eine neue dichotome Variable: Positives Rollenmodell vorhanden (beide Items bejaht) vs. nicht vorhanden (Item 1 verneint oder Item 1 bejaht und Item 2 verneint). |             |                            |
| <i>Kontrollvariablen</i>                                                                              |                                                                                                                                                                                                                                                                                                                                                                                                                                                                                                                                                                                                                                                                                                                                                                                                                                                                                                                                                                                                            |             |                            |
| <b>Alter</b>                                                                                          | Geburtsjahr                                                                                                                                                                                                                                                                                                                                                                                                                                                                                                                                                                                                                                                                                                                                                                                                                                                                                                                                                                                                |             |                            |
| <b>Geschlecht</b>                                                                                     | Zuordnung zu einem Geschlecht (Weiblich, Männlich, Inter/Divers). In den statistischen Analysen zur Hypothesenprüfung konnte die Kategorie „Inter/Divers“ aufgrund der geringen Anzahl an Teilnehmenden in dieser Kategorie nicht berücksichtigt werden.                                                                                                                                                                                                                                                                                                                                                                                                                                                                                                                                                                                                                                                                                                                                                   |             |                            |
| <b>Höchster beruflicher Abschluss</b>                                                                 | Orientiert am European Social Survey (2018); Kodierung nach den Empfehlungen der Bund-Länder-Koordinierungsstelle für den Deutschen Qualifikationsrahmen für lebenslanges Lernen (2019)                                                                                                                                                                                                                                                                                                                                                                                                                                                                                                                                                                                                                                                                                                                                                                                                                    |             |                            |
| <b>Organisationsgröße</b>                                                                             | Orientiert an TNS Infratest Sozialforschung (2016)                                                                                                                                                                                                                                                                                                                                                                                                                                                                                                                                                                                                                                                                                                                                                                                                                                                                                                                                                         |             |                            |
| <b>Arbeitszeit inkl. Überstunden</b>                                                                  | Orientiert an TNS Infratest Sozialforschung (2016)                                                                                                                                                                                                                                                                                                                                                                                                                                                                                                                                                                                                                                                                                                                                                                                                                                                                                                                                                         |             |                            |
| <b>Anzahl der Personen im direkten Arbeitsumfeld</b>                                                  | Angabe einer Zahl                                                                                                                                                                                                                                                                                                                                                                                                                                                                                                                                                                                                                                                                                                                                                                                                                                                                                                                                                                                          |             |                            |

*Fortsetzung nächste Seite*

| Konstrukt                                | Skala                                                                                                                                                                                                                     | Anmerkungen | Beispielitems / Iteminhalt |
|------------------------------------------|---------------------------------------------------------------------------------------------------------------------------------------------------------------------------------------------------------------------------|-------------|----------------------------|
| <i>Kontrollvariablen (Fortsetzung)</i>   |                                                                                                                                                                                                                           |             |                            |
| <b>Anzahl der Stunden im Home-Office</b> | Angabe einer Zahl                                                                                                                                                                                                         |             |                            |
| <b>Befristung</b>                        | Angabe von „Unbefristetes Arbeitsverhältnis“, „Befristetes Arbeitsverhältnis“ oder „Trifft nicht zu / habe keinen Arbeitsvertrag“. Für die statistischen Analysen wurde das Item dichotomisiert (Unbefristet ja vs. nein) |             |                            |
| <b>Beschäftigungsdauer</b>               | Sieben Abstufungen zwischen weniger als einem Monat und über 10 Jahren                                                                                                                                                    |             |                            |

### Literaturverzeichnis

- Anand, P. & Sevak, P. (2017). The role of workplace accommodations in the employment of people with disabilities. *IZA Journal of Labor Policy*, 6(1), 147. <https://doi.org/10.1186/s40173-017-0090-4>
- Baer, M. & Frese, M. (2003). Innovation is not enough: Climates for initiative and psychological safety, process innovations, and firm performance. *Journal of Organizational Behavior*, 24(1), 45–68. <https://doi.org/10.1002/job.179>
- Bund-Länder-Koordinierungsstelle für den Deutschen Qualifikationsrahmen für lebenslanges Lernen (Hrsg.). (2019). *Liste der zugeordneten Qualifikationen*.
- Cable, D. M. & DeRue, D. S. (2002). The convergent and discriminant validity of subjective fit perceptions. *The Journal of Applied Psychology*, 87(5), 875–884. <https://doi.org/10.1037//0021-9010.87.5.875>
- Chakraverty, V., Zimmer, H. & Niehaus, M. (2023). Mittendrin oder nur dabei? Konsequenzen des Inklusionserlebens am Arbeitsplatz für

- Gesundheit, Wohlbefinden und Produktivität von Menschen mit dauerhaften gesundheitlichen Beeinträchtigungen. *Zeitschrift für Arbeits- und Organisationspsychologie*, 67(1), 44–58. <https://doi.org/10.1026/0932-4089/a000392>
- Conyers, L. & Boomer, K. B. (2005). Factors associated with disclosure of HIV/AIDS to employers among individuals who use job accommodations and those who do not. *Journal of Vocational Rehabilitation*, 22(3), 189–198.
- Edmondson, A. (1999). Psychological safety and learning behavior in work teams. *Administrative Science Quarterly*, 44(2), 350–383. <https://doi.org/10.2307/2666999>
- European Social Survey. (2018). *ESS9 Codebook. Apendix A7 (2.0)*.
- Gignac, M. A. M., Cao, X. & McAlpine, J. (2015). Availability, need for, and use of work accommodations and benefits. Are they related to employment outcomes in people with arthritis? *Arthritis Care & Research*, 67(6), 855–864. <https://doi.org/10.1002/acr.22508>
- Haarhaus, B. (2016). Entwicklung und Validierung eines Kurzfragebogens zur Erfassung von allgemeiner und facettenspezifischer Arbeitszufriedenheit. *Diagnostica*, 62(2), 61–73. <https://doi.org/10.1026/0012-1924/a000136>
- Hedman, B. K. (2016). *Developing a measure of inclusiveness: factors, reliability, and relationship to job satisfaction and intention to quit*. Doctoral dissertation, University of Denver. Denver, CO.
- Jansen, W. S., Otten, S. & van der Zee, K. I. (2016). Being different at work: How gender dissimilarity relates to social inclusion and absenteeism. *Group Processes & Intergroup Relations*, 20(6), 879–893. <https://doi.org/10.1177/1368430215625783>
- Jansen, W. S., Otten, S., van der Zee, K. I. & Jans, L. (2014). Inclusion: Conceptualization and measurement. *European Journal of Social*

*Psychology*, 44(4), 370–385. <https://doi.org/10.1002/ejsp.2011>

Jansen, W. S., Vos, M. W., Otten, S., Podsiadlowski, A. & van der Zee, K. I. (2016). Colorblind or colorful? How diversity approaches affect cultural majority and minority employees. *Journal of Applied Social Psychology*, 46(2), 81–93. <https://doi.org/10.1111/jasp.12332>

Konrad, A. M., Moore, M. E., Ng, E. S. W., Doherty, A. J. & Breward, K. (2013). Temporary work, underemployment and workplace accommodations: Relationship to well-being for workers with disabilities. *British Journal of Management*, 24(3), 367–382.

<https://doi.org/10.1111/j.1467-8551.2011.00809.x>

Lysaght, R., Fabrigar, L., Larmour-Trode, S., Stewart, J. & Friesen, M. (2012). Measuring workplace social support for workers with disability.

*Journal of Occupational Rehabilitation*, 22(3), 376–386. <https://doi.org/10.1007/s10926-012-9357-1>

Mor-Barak, M. & Cherin, D. (1998). A tool to expand organizational understanding of workforce diversity: Exploring a measure of inclusion-exclusion. *Administration in Social Work*, 22(1), 47–64. [https://doi.org/10.1300/J147v22n01\\_04](https://doi.org/10.1300/J147v22n01_04)

Padkapayeva, K., Posen, A., Yazdani, A., Buettgen, A., Mahood, Q. & Tompa, E. (2017). Workplace accommodations for persons with physical disabilities: Evidence synthesis of the peer-reviewed literature. *Disability and Rehabilitation*, 39(21), 2134–2147.

<https://doi.org/10.1080/09638288.2016.1224276>

Podsiadlowski, A., Gröschke, D., Kogler, M., Springer, C. & van der Zee, K. (2013). Managing a culturally diverse workforce: Diversity perspectives in organizations. *International Journal of Intercultural Relations*, 37(2), 159–175. <https://doi.org/10.1016/j.ijintrel.2012.09.001>

Prince, M. J. (2017). Persons with invisible disabilities and workplace accommodation: Findings from a scoping literature review. *Journal of*



- Vocational Rehabilitation*, 46(1), 75–86. <https://doi.org/10.3233/JVR-160844>
- Rospenda, K. M. & Richman, J. A. (2004). The factor structure of Generalized Workplace Harassment. *Violence and Victims*, 19(2), 221–238. <https://doi.org/10.1891/088667004780927963>
- Schrader, S. von, Malzer, V. & Bruyère, S. (2014). Perspectives on disability disclosure: The importance of employer practices and workplace climate. *Employee Responsibilities and Rights Journal*, 26(4), 237–255. <https://doi.org/10.1007/s10672-013-9227-9>
- Schrader, S. von, Malzer, V., Erickson, W. & Bruyere, S. (2011). *Emerging employment issues for people with disabilities: Disability disclosure, leave as a reasonable accommodation, use of job applicant screeners*. Ithaca, NY: Cornell University Employment and Disability Institute.
- Sundar, V. (2017). Operationalizing workplace accommodations for individuals with disabilities: A scoping review. *Work (Reading, Mass.)*, 56(1), 135–155. <https://doi.org/10.3233/WOR-162472>
- TNS Infratest Sozialforschung. (2016). *SOEP 2016 – Erhebungsinstrumente 2016 (Welle 33) des Sozio-oekonomischen Panels: Personenfragebogen, Stichproben A-L3*. Series A - Survey Instruments. Berlin, Germany: DIW/SOEP.
- Ver.di – Vereinte Dienstleistungsgewerkschaft. (2014). *Arbeitsbedingungen von Menschen mit Behinderung. So beurteilen sie selbst die Lage*. Ergebnisse einer Sonderauswertung der Repräsentativumfrage zum DGB-Index Gute Arbeit (9). Berlin, Germany.
- Wang, J., Patten, S., Currie, S., Sareen, J. & Schmitz, N. (2011). Perceived needs for and use of workplace accommodations by individuals with a depressive and/or anxiety disorder. *Journal of Occupational and Environmental Medicine*, 53(11), 1268–1272. <https://doi.org/10.1097/JOM.0b013e31822cfd82>
