# Supplementary material for: Eine Frage der Wertschätzung, Passung und Normen
Source: Atypon-hosted journal article supplement (doi:10.1026/0932-4089/a000412), 2023-05-08
Supplement: 0932-4089_a000412_esm4.pdf [file 0932-4089_a000412_esm4.pdf]

## ESM 4

**Messmodelle und gemeinsame Modellierung der organisationalen Rahmenbedingungen****Tabelle E1***Messmodelle aller erfassten latenten Variablen*

| Skala                                                                                                          | Messmodell |
|----------------------------------------------------------------------------------------------------------------|------------|
| Inklusionserleben <sup>1</sup>                                                                                 | R          |
| Wertschätzung und Akzeptanz durch Vorgesetzte                                                                  | R          |
| Wertschätzung und Akzeptanz durch Kolleg:innen                                                                 | R          |
| Sicherheit im Team                                                                                             | R          |
| Angriffe und Diffamierungen                                                                                    | F          |
| Wertschätzung der Vielfalt körperlicher und psychischer Fähigkeiten auf Organisationsebene <sup>1</sup>        | R          |
| Passung der Arbeitsanforderungen zu den eigenen Fähigkeiten                                                    | R          |
| Zufriedenheit mit der Bezahlung                                                                                | R          |
| Adäquatheit von Arbeitsplatzanpassungen <sup>2</sup>                                                           | -          |
| Positive Rollenmodelle für den Umgang mit gesundheitlichen Beeinträchtigungen in der Organisation <sup>2</sup> | -          |
| Faire Beschäftigungspraktiken                                                                                  | R          |
| Beteiligung an Entscheidungsprozessen                                                                          | R          |
| Positive Organisationskultur im Umgang mit Menschen mit gesundheitlichen Beeinträchtigungen                    | R          |

*Anmerkungen.* R = reflektiv, F = formativ. Die Einstufungen der Messmodelle erfolgten nach den Empfehlungen von Hair, Risher, Sarstedt und Ringle (2019): Als reflektiv eingestuft wurde eine Messmodell, wenn die Ladungen aller Indikatoren über .708 lagen (als Maß für die Beurteilung der Indikator-Reliabilität), der Wert für  $\rho_A$  (Dijkstra & Henseler, 2015) zwischen .70 und .95 lag (als Maß für die Beurteilung der internen Konsistenz), die *average variance extracted* (AVE)<sup>1</sup> über .50 lag (als Maß für die Beurteilung der konvergenten Validität bzw. des Ausmaßes, in dem eine Messung einer latenten Variablen mit alternativen Messungen positiv korreliert) und die Heterotrait-Monotrait-Verhältnisse (Henseler, Ringle & Sarstedt, 2015) der jeweiligen Variable zu den übrigen Variablen unter .85 lagen (als Maß für die Beurteilung der diskriminanten Validität bzw. des Ausmaßes, in dem sich eine latente Variable sich von anderen Variablen im Strukturmodell unterscheidet). Als formativ eingestuft wurde ein Messmodell, wenn Ladungen unter .708 auftraten, die Werte für die äußeren Varianzinflationsfaktoren aller Indikatoren unter 3 lagen (als Maß für die Beurteilung möglicher Multikollinearität) und die Konfidenzintervalle der Gewichte aller Indikatoren nicht den Wert 0 enthielten oder, falls dies nicht der Fall war, a) betroffene Indikatoren zumindest eine signifikante Ladung von mindestens .50 aufwiesen oder, falls dies ebenfalls nicht der Fall war, b) die Ladung zumindest signifikant wurde und der Indikator aus inhaltlichen Erwägungen im Modell verbleiben sollte (als Vorgehen zur Beurteilung der statistischen Relevanz eines Indikators).

<sup>1</sup> Der Wert für  $\rho_A$  lag knapp über .95 und indizierte damit mögliche Redundanz innerhalb des Modells. Wir verzichteten dennoch auf die Entfernung von Indikatoren, da es sich bei beiden betroffenen Skalen bereits um sehr kurze Instrumente handelt.

<sup>2</sup> 1-Item Skalen

**Tabelle E2**

*Ladungen, Cronbachs  $\alpha$  und AVE in den reflexive Messmodellen der latenten Variablen höherer Ordnungen zur Vorhersage des Inklusionserlebens*

|                                            | Ladungen*  |
|--------------------------------------------|------------|
| <b>Positive Organisationskultur</b>        | (.78; .82) |
| Positive Sicht Arbeitgeber                 | .89        |
| Unterstützende Arbeitsbedingungen          | .92        |
| <b>Mitgestaltung und Entwicklung</b>       | (.79; .83) |
| Faire Praktiken Potenzialentfaltung        | .93        |
| Mitbestimmung Entscheidungen               | .90        |
| <b>Passende Arbeitsplätze <sup>a</sup></b> |            |
| Passung Fähigkeiten Anforderungen          | .97        |
| Adäquatheit der Anpassungen                | .56        |
| <b>Teamklima</b>                           | (.80; .62) |
| Wertschätzender Umgang Kolleg:innen        | .81        |
| Wertschätzender Umgang Vorgesetzte         | .77        |
| Sicherheit Team                            | .79        |
| Fehlen von Angriffen und Diffamierungen    | .78        |

*Anmerkungen.* Als Ladungen werden die standardisierten Pfadkoeffizienten der Beziehungen zwischen den Variablen niedriger Ordnung und den Variablen höherer Ordnung verwendet (Berechnung in jeweils getrennten Modellen).

\* Der erste Wert in der Klammer beziffert den Wert für Cronbachs  $\alpha$ , der zweite die *average variance extracted* (AVE).

<sup>a</sup> Aufgrund der Ladung von „Adäquatheit der Anpassungen“ (< .708) kann für diese latente Variable kein reflexives Messmodell beibehalten werden. Cronbachs  $\alpha$  und die AVE werden daher nicht berechnet.

**Tabelle E3**

*Heterotrait-Monotrait-Matrix für die latente Variable höherer Ordnung „Positive Organisationskultur“ zur Vorhersage des Inklusionserlebens*

|                                     | Inklusionserleben | Unterstützende Arbeitsbedingungen | <b>Positive Organisationskultur</b> | Positive Sicht Arbeitgeber |
|-------------------------------------|-------------------|-----------------------------------|-------------------------------------|----------------------------|
| Inklusionserleben                   |                   |                                   |                                     |                            |
| Unterstützende Arbeitsbedingungen   | 0.429             |                                   |                                     |                            |
| <b>Positive Organisationskultur</b> | 0.464             | <i>1.009</i>                      |                                     |                            |
| Positive Sicht Arbeitgeber          | 0.407             | 0.683                             | <i>0.940</i>                        |                            |

*Anmerkungen.* Von Interesse sind alle HTMT-Verhältnisse außer zwischen der latenten Variablen höherer Ordnung und seinen Indikatoren bzw. den Variablen niedriger Ordnung (Sarstedt, Hair, Ringle, Thiele & Gudergan, 2016). Die entsprechenden Werte sind kursiv.

**Tabelle E4**

*Heterotrait-Monotrait-Matrix für die latente Variable höherer Ordnung „Mitgestaltung und Entwicklung“ zur Vorhersage des Inklusionserlebens*

|                                      | Mitbestimmung Entscheidungen | <b>Mitgestaltung und Entwicklung</b> | Faire Praktiken Potenzialentfaltung | Inklusionserleben |
|--------------------------------------|------------------------------|--------------------------------------|-------------------------------------|-------------------|
| Mitbestimmung Entscheidungen         |                              |                                      |                                     |                   |
| <b>Mitgestaltung und Entwicklung</b> | 0.974                        |                                      |                                     |                   |
| Faire Praktiken Potenzialentfaltung  | 0.726                        | 1.017                                |                                     |                   |
| Inklusionserleben                    | 0.522                        | 0.662                                | 0.684                               |                   |

*Anmerkungen.* Von Interesse sind alle die HTMT-Verhältnisse außer zwischen der latenten Variablen höherer Ordnung und seinen Indikatoren bzw. den Variablen niedriger Ordnung (Sarstedt et al., 2016). Die entsprechenden Werte sind kursiv.

**Tabelle E5**

*Heterotrait-Monotrait-Matrix für die latente Variable höherer Ordnung „Teamklima“ zur Vorhersage des Inklusionserlebens*

|                                     | <b>Teamklima</b> | Inklusionserleben | Sicherheit Team | Wertschätzender Umgang Kolleg:innen | Wertschätzender Umgang Vorgesetzte |
|-------------------------------------|------------------|-------------------|-----------------|-------------------------------------|------------------------------------|
| <b>Teamklima</b>                    |                  |                   |                 |                                     |                                    |
| Inklusionserleben                   | 0.819            |                   |                 |                                     |                                    |
| Sicherheit Team                     | 0.942            | 0.737             |                 |                                     |                                    |
| Wertschätzender Umgang Kolleg:innen | 0.854            | 0.757             | 0.668           |                                     |                                    |
| Wertschätzender Umgang Vorgesetzte  | 0.822            | 0.584             | 0.549           | 0.558                               |                                    |

*Anmerkungen.* Von Interesse sind alle die HTMT-Verhältnisse außer zwischen der latenten Variablen höherer Ordnung und seinen Indikatoren bzw. den Variablen niedriger Ordnung (Sarstedt et al., 2016). Die entsprechenden Werte sind kursiv. Die Variable „Angriffe und Diffamierungen“ ist in der Tabelle nicht enthalten, da sie formativ modelliert wurde und in die Berechnung der HTMT-Matrix nur reflexiv modellierte Variablen eingehen.

**Tabelle E6**

*Varianzinflationsfaktoren der beiden latenten Variablen niedriger Ordnung im*

*Zusammenhang mit der latenten Variablen höherer Ordnung „Passende Arbeitsplätze“ zur*

*Vorhersage des Inklusionserlebens*

|                                   | VIF  |
|-----------------------------------|------|
| Passung Fähigkeiten Anforderungen | 1.13 |
| Adäquatheit der Anpassungen       | 1.13 |

*Anmerkungen.* VIF = Varianzinflationsfaktor

**Tabelle E7**

*Ladungen in dem formativen Messmodell höherer Ordnung „Passende Arbeitsplätze“ zur*

*Vorhersage des Inklusionserlebens*

|                                   | Ladung | p   |
|-----------------------------------|--------|-----|
| Passung Fähigkeiten Anforderungen | .70    | .00 |
| Adäquatheit der Anpassungen       | .52    | .00 |

*Anmerkungen.* Als Ladungen werden die standardisierten Pfadkoeffizienten der Beziehungen zwischen den latenten Variablen niedriger Ordnung und der latenten Variablen höherer Ordnung verwendet

**Tabelle E8**

*Korrelationen (Spearman's Rho) zwischen den organisationalen Rahmenbedingungen*

|                                  | 1      | 2      | 3      | 4      | 5      |
|----------------------------------|--------|--------|--------|--------|--------|
| 1. Teamklima                     |        |        |        |        |        |
| 2. Mitgestaltung und Entwicklung | .70*** |        |        |        |        |
| 3. Positive Organisationskultur  | .50*** | .59*** |        |        |        |
| 4. Passende Arbeitsplätze        | .47*** | .57*** | .47*** |        |        |
| 5. Zufriedenstellende Bezahlung  | .32*** | .36*** | .27*** | .28*** |        |
| 6. Positive Rollenmodelle        | .19*** | .23*** | .32*** | .24*** | .13*** |

\*\*\*  $p < .001$  (zweiseitig,  $N = 801$ )

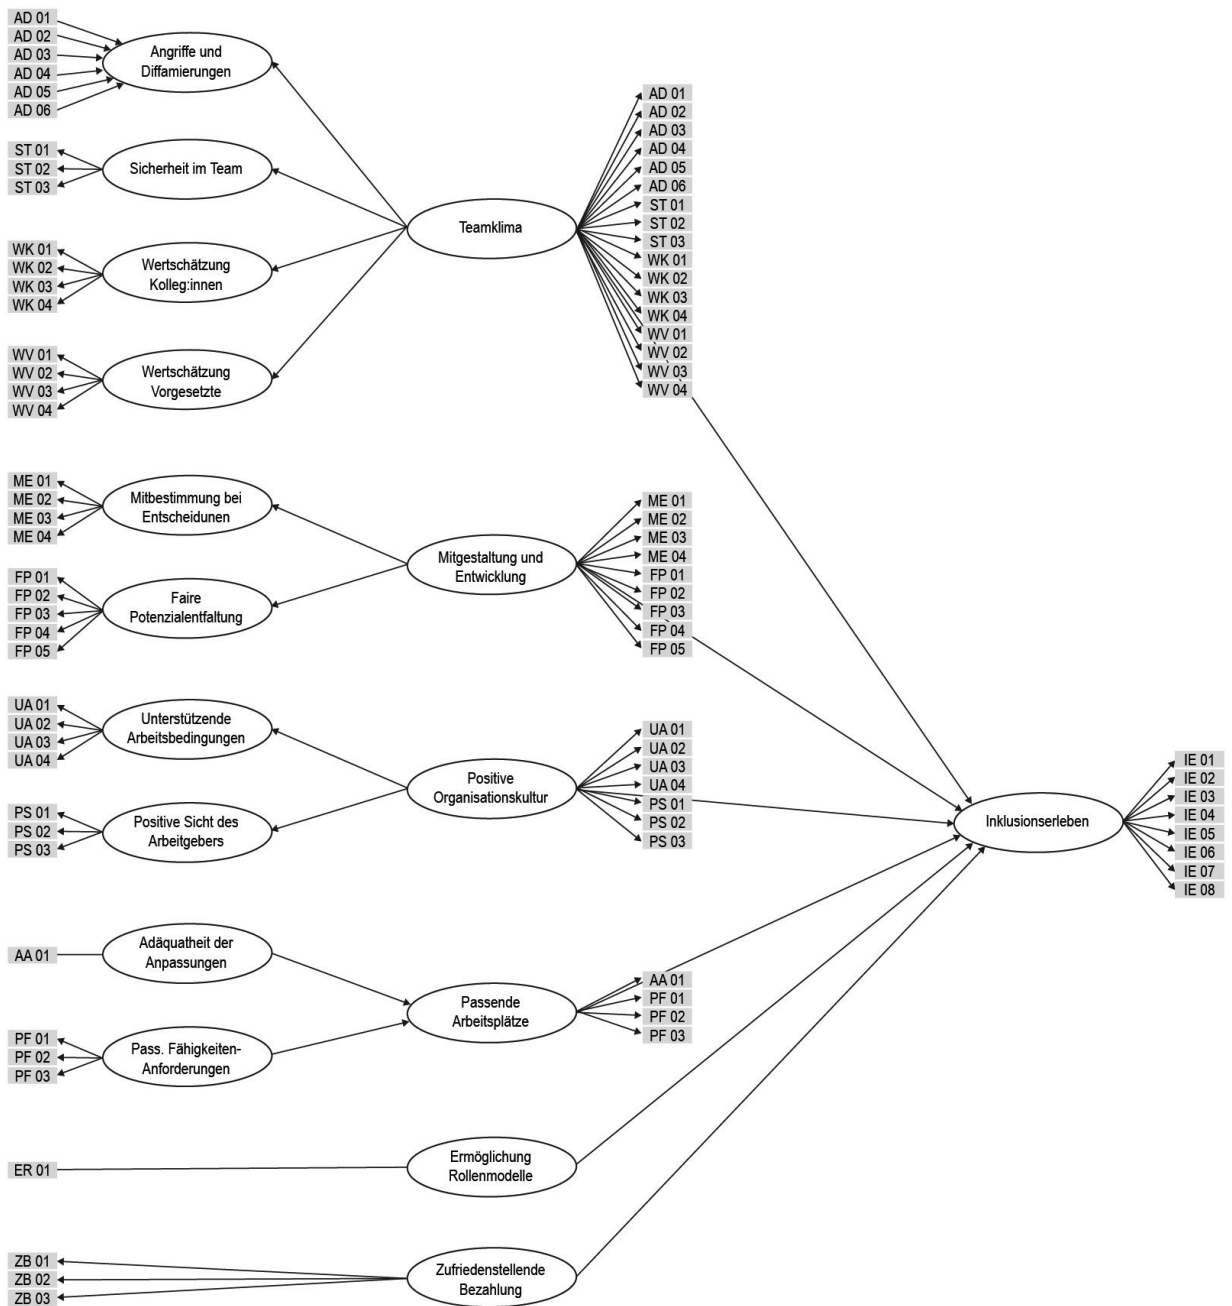

**Abb. E1.** Hierarchische Modellierung der sechs organisationalen Rahmenbedingungen – Schritt 1: Berechnung von Faktorwerten im Repeated-Indicator-Ansatz

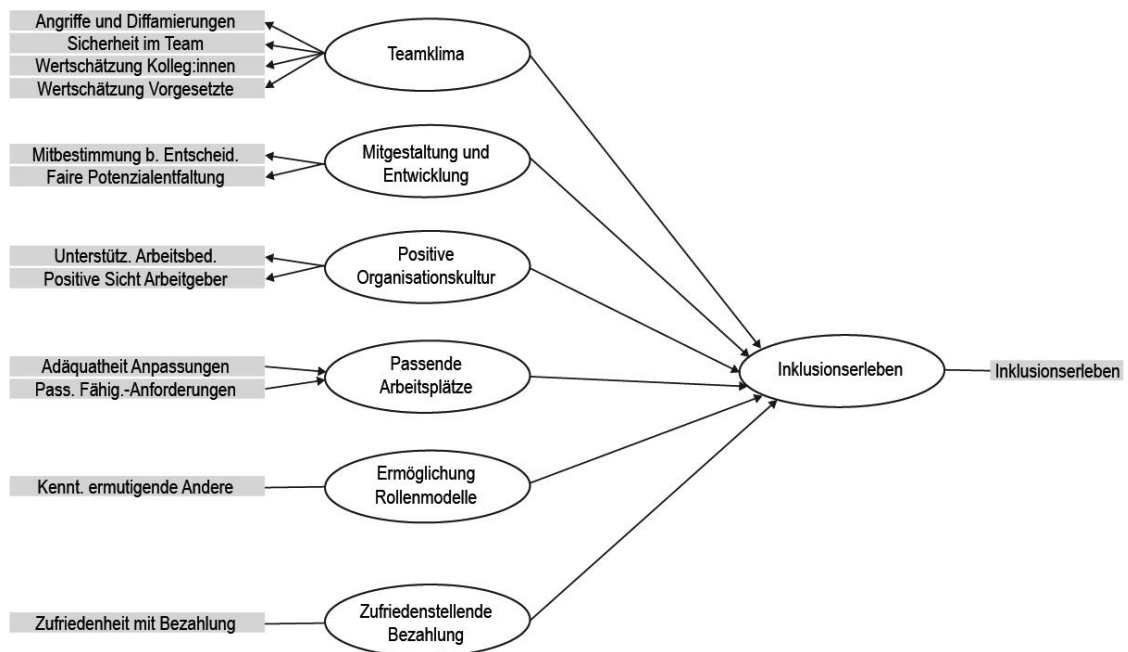

**Abb. E2.** Hierarchische Modellierung der sechs organisationalen Rahmenbedingungen – Schritt 2: Nutzung der Faktoren aus Schritt 1 als Indikatoren

**Literaturverzeichnis**

- Dijkstra, T. K. & Henseler, J. (2015). Consistent partial least squares path modeling. *MIS Quarterly*, 39(2), 297–316.
- Hair, J. F., Risher, J. J., Sarstedt, M. & Ringle, C. M. (2019). When to use and how to report the results of PLS-SEM. *European Business Review*, 31(1), 2–24.
- Henseler, J., Ringle, C. M. & Sarstedt, M. (2015). A new criterion for assessing discriminant validity in variance-based structural equation modeling. *Journal of the Academy of Marketing Science*, 43(1), 115–135.
- Sarstedt, M., Hair, J. F., Ringle, C. M., Thiele, K. O. & Gudergan, S. P. (2016). Estimation issues with PLS and CBSEM. Where the bias lies! *Journal of Business Research*, 69(10), 3998–4010.
